# Supplementary material for: Clinical Outcomes and Prognostic Factors in Complex, High-Risk Indicated Procedure (CHIP) and High-Bleeding-Risk (HBR) Patients Undergoing Percutaneous Coronary Intervention with Sirolimus-Eluting Stent Implantation: 4-Year Results
Source: MDPI journal article supplement (doi:10.3390/jcm12165313), 2023-08-15
Supplement: s1 [file s1]

## Supplementary tables

**Supplementary Table S1. Baseline characteristics: CHIP vs. non-CHIP.**

| Parameter                                    | Non-CHIP<br>N = 151 | CHIP<br>N = 81 | P     |
|----------------------------------------------|---------------------|----------------|-------|
| Females                                      | 42 (28)             | 22 (27)        | 0.915 |
| Age [years]                                  | 67 ± 11             | 70 ± 11        | 0.027 |
| Acute coronary syndrome type at presentation |                     |                |       |
| UA                                           | 18 (11.9)           | 13 (16.0)      | 0.003 |
| NSTEMI                                       | 10 (6.6)            | 16 (19.8)      |       |
| STEMI                                        | 19 (12.6)           | 13 (16.0)      |       |
| Cardiogenic shock                            | 3 (2.0)             | 3 (3.7)        | 0.423 |
| Arterial hypertension                        | 130 (90.7)          | 76 (93.8)      | 0.412 |
| Diabetes type 2                              | 52 (34.4)           | 45 (55.6)      | 0.002 |
| Dyslipidemia                                 | 107 (70.9)          | 70 (86.4)      | 0.008 |
| Prior myocardial infarction                  | 71 (47.0)           | 42 (51.9)      | 0.483 |
| Prior PCI                                    | 82 (54.3)           | 48 (59.3)      | 0.469 |
| Prior CABG                                   | 10 (6.6)            | 12 (14.8)      | 0.042 |
| Chronic kidney disease                       | 26 (17.2)           | 16 (19.8)      | 0.633 |
| Prior stroke                                 | 11 (7.3)            | 6 (7.4)        | 0.973 |
| Peripheral artery disease                    | 13 (8.6)            | 12 (14.8)      | 0.146 |
| COPD                                         | 7 (4.6)             | 6 (7.4)        | 0.385 |
| Echocardiographic parameters                 |                     |                |       |
| LVEDd [mm]                                   | 49.4 ± 9.4          | 52.0 ± 7.9     | 0.179 |
| IVSd [mm]                                    | 11.4 ± 2.0          | 11.4 ± 2.4     | 0.633 |
| PWDd [mm]                                    | 10.4 ± 1.4          | 10.6 ± 1.9     | 0.331 |
| LA [mm]                                      | 40.1 ± 5.8          | 41.0 ± 6.0     | 0.182 |
| TAPSE [mm]                                   | 21.9 ± 4.2          | 22.2 ± 4.5     | 0.948 |
| LVEF [%]                                     | 49.8 ± 10.6         | 48.9 ± 10.4    | 0.451 |
| Severe MR                                    | 4 (3.3)             | 2 (2.7)        | 0.999 |
| Severe AR                                    | 1 (0.8)             | 0              | 0.999 |
| Severe AS                                    | 1 (0.8)             | 3 (4.1)        | 0.151 |

**Supplementary Table S2. Baseline characteristics: HBR vs. non-HBR.**

| Parameter                                    | Non-HBR<br>N = 156 | HBR<br>N = 76 | P      |
|----------------------------------------------|--------------------|---------------|--------|
| Females                                      | 39 (25)            | 25 (33%)      | 0.207  |
| Age [years]                                  | 63 ± 9             | 77 ± 8        | <0.001 |
| Acute coronary syndrome type at presentation |                    |               |        |
| UA                                           | 20 (12.8)          | 11 (14.5)     | 0.271  |
| NSTEMI                                       | 15 (9.6)           | 11 (14.5)     |        |
| STEMI                                        | 22 (14.1)          | 10 (13.2)     |        |
| Cardiogenic shock                            | 3 (1.9)            | 3 (3.9)       | 0.396  |
| Arterial hypertension                        | 142 (91.0)         | 71 (93.4)     | 0.532  |
| Diabetes type 2                              | 53 (34.0)          | 44 (57.9)     | <0.001 |
| Dyslipidemia                                 | 116 (74.4)         | 61 (80.3)     | 0.321  |
| Prior myocardial infarction                  | 70 (44.9)          | 43 (56.6)     | 0.094  |
| Prior PCI                                    | 81 (51.9)          | 49 (64.5)     | 0.071  |
| Prior CABG                                   | 11 (7.1)           | 11 (14.5)     | 0.070  |
| Chronic kidney disease                       | 15 (9.6)           | 27 (35.5)     | <0.001 |
| Prior stroke                                 | 7 (4.5)            | 10 (13.2)     | 0.017  |
| Peripheral artery disease                    | 16 (10.3)          | 9 (11.8)      | 0.715  |
| COPD                                         | 7 (4.5)            | 6 (7.9)       | 0.363  |
| Echocardiographic parameters                 |                    |               |        |
| LVEDd [mm]                                   | 49.8 ± 9.2         | 51.5 ± 8.5    | 0.802  |
| IVSd [mm]                                    | 11.4 ± 2.3         | 11.6 ± 1.7    | 0.422  |
| PWDd [mm]                                    | 10.4 ± 1.6         | 10.5 ± 1.6    | 0.911  |
| LA [mm]                                      | 38.9 ± 5.4         | 43.2 ± 5.8    | <0.001 |
| TAPSE [mm]                                   | 22.4 ± 4.1         | 21.3 ± 4.8    | 0.111  |
| LVEF [%]                                     | 50.7 ± 9.3         | 47.0 ± 12.2   | 0.054  |
| Severe MR                                    | 2 (1.6)            | 4 (6.1)       | 0.183  |
| Severe AR                                    | 1 (0.8)            | 0             | 0.999  |
| Severe AS                                    | 1 (0.8)            | 3 (4.5)       | 0.115  |

**Supplementary Table S3.** Laboratory test findings CHIP vs. non-CHIP.

| Parameter                       | Non-CHIP<br>N = 151 | CHIP<br>N = 81     | P     |
|---------------------------------|---------------------|--------------------|-------|
| White blood cells [ $10^9/L$ ]  | $8.5 \pm 2.9$       | $8.6 \pm 2.3$      | 0.375 |
| Hemoglobin [g/dL]               | $13.5 \pm 1.6$      | $13.1 \pm 1.7$     | 0.104 |
| Red blood cells [ $10^{12}/L$ ] | $4.5 \pm 0.5$       | $4.3 \pm 0.5$      | 0.038 |
| Platelets [ $10^9/L$ ]          | $226.7 \pm 65.9$    | $215.8 \pm 63$     | 0.345 |
| Glucose [md/dL]                 | $124.2 \pm 53.9$    | $154.8 \pm 75.3$   | 0.001 |
| HbA1c [%]                       | 6.3 (5.8-7.2)       | 6.6 (6.1-7.3)      | 0.117 |
| Total cholesterol [md/dL]       | $165.4 \pm 44.0$    | $161.5 \pm 60.6$   | 0.204 |
| HDL [md/dL]                     | $46.7 \pm 15.8$     | $44.0 \pm 43.5$    | 0.635 |
| LDL [md/dL]                     | $94.1 \pm 38.7$     | $83.0 \pm 42.6$    | 0.042 |
| Triglycerides [md/dL]           | $124.3 \pm 78.0$    | $170.7 \pm 89.9$   | 0.112 |
| Creatine [md/dL]                | $1.1 \pm 0.6$       | $1.2 \pm 0.9$      | 0.340 |
| eGFR                            | $72.2 \pm 23.0$     | $67.4 \pm 23.4$    | 0.211 |
| TnI at admission [ng/mL]        | 75.5 (15.1-831.6)   | 211.5 (28.2-754.5) | 0.292 |
| Max. TnI [ng/mL]                | 1078 (42.0-8056.5)  | 1263 (88.2-13371)  | 0.358 |
| CK                              | 133 (84.5-310.5)    | 169 (75-319)       | 0.845 |
| CK max                          | 161.5 (93.8-498.5)  | 183 (80-390)       | 0.984 |
| CK-MB                           | 17 (14-26.2)        | 20 (13-34.5)       | 0.251 |
| CK-MB max                       | 20.5 (15-44.5)      | 26.5 (14.2-68)     | 0.338 |

**Supplementary Table S4.** Laboratory test findings HBR vs. non-HBR.

| Parameter                       | Non-HBR<br>N = 156  | HBR<br>N = 76    | P      |
|---------------------------------|---------------------|------------------|--------|
| White blood cells [ $10^9/L$ ]  | $8.8 \pm 2.9$       | $8.0 \pm 2.2$    | 0.041  |
| Hemoglobin [g/dL]               | $14.0 \pm 1.1$      | $12.1 \pm 1.9$   | <0.001 |
| Red blood cells [ $10^{12}/L$ ] | $4.6 \pm 0.4$       | $4.1 \pm 0.6$    | <0.001 |
| Platelets [ $10^9/L$ ]          | $223.1 \pm 65.3$    | $222.5 \pm 64.7$ | 0.816  |
| Glucose [md/dL]                 | $129.2 \pm 55.1$    | $148.3 \pm 77.4$ | 0.118  |
| HbA1c [%]                       | 6.3 (5.8-8.0)       | 6.4 (6.0-7.1)    | 0.572  |
| Total cholesterol [md/dL]       | $177.3 \pm 52.2$    | $143.4 \pm 41.4$ | <0.001 |
| HDL [md/dL]                     | $46.3 \pm 15.5$     | $44.7 \pm 13.1$  | 0.844  |
| LDL [md/dL]                     | $98.7 \pm 41.0$     | $76.0 \pm 35.8$  | <0.001 |
| Triglycerides [md/dL]           | $160.8 \pm 62.1$    | $113.1 \pm 62.3$ | 0.007  |
| Creatine [md/dL]                | $1.0 \pm 0.6$       | $1.4 \pm 0.8$    | <0.001 |
| eGFR                            | $77.5 \pm 21.3$     | $56.6 \pm 20.4$  | <0.001 |
| TnI at admission [ng/mL]        | 129 (15.3-197.2)    | 62.5 (19.0-1446) | 0.711  |
| Max. TnI [ng/mL]                | 1261 (60.0-11756.5) | 372 (44.0-8802)  | 0.397  |
| CK                              | 164 (91.0-292)      | 118 (72-334)     | 0.147  |
| CK max                          | 180 (103-518.5)     | 156 (74-363)     | 0.152  |
| CK-MB                           | 17 (14-30)          | 18 (13-29.8)     | 0.921  |
| CK-MB max                       | 22 (15-61.2)        | 23.5 (14.2-40)   | 0.756  |

**Supplementary Table S5.** Lesion and procedure characteristics CHIP vs. non-CHIP.

| Parameter             | Non-CHIP<br>N = 151 | CHIP<br>N = 81  | P      |
|-----------------------|---------------------|-----------------|--------|
| Lesion location       |                     |                 |        |
| LM                    | 1 (0.7)             | 8 (9.9)         | 0.0011 |
| LAD                   | 51 (33.8)           | 21 (25.9)       |        |
| LCx                   | 45 (29.8)           | 16 (19.8)       |        |
| RCA                   | 54 (35.8)           | 36 (44.4)       |        |
| VG                    | 0                   | 6 (7.4)         |        |
| Lesion type           |                     |                 |        |
| A                     | 26 (17.2)           | 12 (14.8)       | 0.014  |
| B1                    | 49 (32.5)           | 17 (21)         |        |
| B2                    | 28 (18.5)           | 9 (11.1)        |        |
| C                     | 48 (31.8)           | 43 (53.1)       |        |
| Heavy calcification   | 9 (6.0)             | 9 (11.1)        | 0.162  |
| Coronary bifurcation  | 11 (7.3)            | 12 (14.8)       | 0.067  |
| SYNTAX                | 12.9 ± 8.7          | 16.0 ± 8.4      | 0.008  |
| SYNTAX II PCI         | 31.6 ± 11.2         | 35.6 ± 10.1     | 0.003  |
| SYNTAX II CABG        | 28.6 ± 11.1         | 29.9 ± 10.5     | 0.491  |
| EuroScore II          | 1.3 (0.8 – 2.5)     | 2.5 (1.3 – 4.3) | <0.001 |
| Lesion predilatation  | 96 (63.6)           | 47 (58.0)       | 0.407  |
| Stent diameter [mm]   | 3.1 ± 0.5           | 3.3 ± 0.5       | 0.039  |
| Stent length [mm]     | 18.3 ± 7.0          | 26.7 ± 14.3     | <0.001 |
| Stent pressure [atm]  | 15.2 (2.7)          | 15.5 ± 2.6      | 0.578  |
| 2 <sup>nd</sup> stent | 19 (12.7)           | 71 (87.7)       | <0.001 |
| Stent postdilatation  | 54 (35.8)           | 34 (42.0)       | 0.352  |
| Access site           |                     |                 |        |
| Transradial           | 129 (85.4)          | 64 (79)         | 0.213  |
| Transfemoral          | 24 (15.9)           | 19 (23.5)       |        |
| Guiding catheter      |                     |                 |        |
| 6F                    | 146 (96.7)          | 76 (93.8)       | 0.325  |
| 7F                    | 6 (4.0)             | 5 (6.2)         |        |
| Dissection            | 5 (3.3)             | 11 (13.6)       | 0.003  |
| MI typa 4a            | 4 (2.7)             | 1 (1.2)         | 0.660  |

**Supplementary Table S6.** Lesion and procedure characteristics HBR vs. non-HBR.

| Parameter             | Non-HBR<br>N = 156 | HBR<br>N = 76   | P      |
|-----------------------|--------------------|-----------------|--------|
| Lesion location       |                    |                 |        |
| LM                    | 4 (2.6)            | 5 (6.6)         | 0.025  |
| LAD                   | 41 (26.3)          | 31 (40.8)       |        |
| LCx                   | 47 (30.1)          | 14 (8.4)        |        |
| RCA                   | 61 (39.1)          | 29 (38.2)       |        |
| VG                    | 4 (2.6)            | 2 (2.6)         |        |
| Lesion type           |                    |                 |        |
| A                     | 24 (15.4)          | 14 (18.4)       | 0.430  |
| B1                    | 42 (26.9)          | 24 (31.6)       |        |
| B2                    | 29 (18.6)          | 8 (10.5)        |        |
| C                     | 61 (39.1)          | 30 (39.5)       |        |
| Heavy calcification   | 12 (7.7)           | 6 (7.9)         | 0.957  |
| Coronary bifurcation  | 17 (10.9)          | 6 (7.9)         | 0.473  |
| SYNTAX                | 13.5 ± 8.4         | 14.8 ± 9.2      | 0.351  |
| SYNTAX II PCI         | 29.6 ± 9.5         | 40.3 ± 10.5     | <0.001 |
| SYNTAX II CABG        | 29.5 ± 11.0        | 28.4 ± 10.5     | 0.514  |
| EuroScore II          | 1.2 (0.8 – 2.3)    | 3.6 (1.8 – 6.6) | <0.001 |
| Lesion predilatation  | 95 (60.9)          | 48 (63.2)       | 0.740  |
| Stent diameter [mm]   | 3.2 ± 0.5          | 3.1 ± 0.5       | 0.472  |
| Stent length [mm]     | 21.7 ± 11.8        | 20.3 ± 8.8      | 0.742  |
| Stent pressure [atm]  | 15.3 ± 2.8         | 15.4 ± 2.5      | 0.452  |
| 2 <sup>nd</sup> stent | 56 (36.1)          | 34 (44.7)       | 0.207  |
| Stent postdilatation  | 61 (39.1)          | 54 (35.8)       | 0.598  |
| Access site           |                    |                 |        |
| Transradial           | 137 (87.8)         | 56 (73.7)       | 0.007  |
| Transfemoral          | 23 (14.7)          | 20 (26.3)       |        |
| Guiding catheter      |                    |                 |        |
| 6F                    | 151 (96.8)         | 71 (93.4)       | 0.303  |
| 7F                    | 6 (3.8)            | 5 (6.6)         |        |
| Dissection            | 13 (8.3)           | 3 (3.9)         | 0.216  |
| MI typa 4a            | 4 (2.6)            | 1 (1.3)         | 0.999  |

**Supplementary Table S7.** Medications at discharge CHIP vs. non-CHIP.

| Parameter                               | Non-CHIP<br>N = 151 | CHIP<br>N = 81 | P      |
|-----------------------------------------|---------------------|----------------|--------|
| Acetylsalicylic acid                    | 151 (100)           | 81 (100)       | 1      |
| P2Y12                                   |                     |                |        |
| Clopidogrel                             | 140 (92.7)          | 74 (91.4)      | 0.713  |
| Prasugrel                               | 0                   | 1 (1.2)        | 0.349  |
| Ticagrelor                              | 11 (7.3)            | 6 (7.4)        | 0.973  |
| Beta-blocker                            | 143 (94.7)          | 80 (98.8)      | 0.167  |
| Ca-blocker                              | 32 (21.2)           | 21 (25.9)      | 0.413  |
| Angiotensin converting enzyme inhibitor | 124 (82.1)          | 66 (81.5)      | 0.904  |
| Angiotensin receptor blocker            | 22 (14.6)           | 14 (17.3)      | 0.586  |
| Diuretic                                | 74 (49.0)           | 51 (63)        | 0.042  |
| Mineralocorticoid receptor antagonist   | 32 (21.2)           | 16 (19.8)      | 0.796  |
| Nitrates                                | 5 (3.3)             | 8 (9.9)        | 0.068  |
| Vitamin K antagonist                    | 13 (8.6)            | 4 (4.9)        | 0.306  |
| Novel oral anticoagulant                | 6 (3.9)             | 5 (6.1)        | 0.455  |
| Statin                                  | 149 (98.7)          | 81 (100)       | 0.544  |
| Hypoglycemic medications                | 33 (21.9)           | 29 (35.8)      | 0.022  |
| Insulin                                 | 13 (8.6)            | 20 (24.7)      | <0.001 |

**Supplementary Table S8.** Medications at discharge HBR vs. non-HBR.

| Parameter                               | Non-HBR<br>N = 156 | HBR<br>N = 76 | P      |
|-----------------------------------------|--------------------|---------------|--------|
| Acetylsalicylic acid                    | 156 (100)          | 76 (100)      | 1      |
| P2Y12                                   |                    |               |        |
| Clopidogrel                             | 142 (91)           | 72 (94.7)     | 0.321  |
| Prasugrel                               | 1 (0.6)            | 0             | 0.99   |
| Ticagrelor                              | 13 (8.3)           | 4 (5.3)       | 0.400  |
| Beta-blocker                            | 150 (96.2)         | 73 (96.1)     | 0.999  |
| Ca-blocker                              | 41 (26.3)          | 12 (15.8)     | 0.074  |
| Angiotensin converting enzyme inhibitor | 130 (83.3)         | 60 (78.9)     | 0.415  |
| Angiotensin receptor blocker            | 23 (14.7)          | 13 (17.1)     | 0.641  |
| Diuretic                                | 64 (41)            | 61 (80.3)     | <0.001 |
| Mineralocorticoid receptor antagonist   | 28 (17.9)          | 20 (26.3)     | 0.140  |
| Nitrates                                | 6 (3.8)            | 7 (9.2)       | 0.127  |
| Vitamin K antagonist                    | 1 (0.6)            | 16 (21.1)     | <0.001 |
| Novel oral anticoagulant                | 1 (0.6)            | 10 (13.1)     | 0.002  |
| Statin                                  | 154 (98.7)         | 76 (100)      | 0.999  |
| Hypoglycemic medications                | 39 (25)            | 23 (30.3)     | 0.395  |
| Insulin                                 | 15 (9.6)           | 18 (23.7)     | 0.004  |



**Supplementary Table S9.** Univariable Cox regression for MACE: the whole population.

| Characteristic        | N   | HR1  | 95% CI1    | p-value |
|-----------------------|-----|------|------------|---------|
| sex                   | 232 |      |            |         |
| Female                |     | —    | —          |         |
| Male                  |     | 1.06 | 0.53, 2.11 | 0.862   |
| age                   | 232 | 1.00 | 0.97, 1.03 | 0.969   |
| CHIP                  | 232 | 1.69 | 0.92, 3.10 | 0.090   |
| HBR                   | 232 | 1.84 | 1.00, 3.38 | 0.049   |
| ACS                   | 232 | 1.0  | 0.53, 1.85 | 0.987   |
| LM                    | 232 | 5.24 | 2.06, 13.4 | <0.001  |
| stent length          | 232 | 1.02 | 1.0, 1.04  | 0.126   |
| stent diameter        | 232 | 1.37 | 0.75, 2.50 | 0.310   |
| Lesion type           | 232 |      |            |         |
| A/B1                  |     | —    | —          |         |
| B2/C                  |     | 1.67 | 0.88, 3.17 | 0.119   |
| calcification         | 232 | 2.67 | 1.19, 6.02 | 0.018   |
| second stent          | 231 | 2.28 | 1.24, 4.19 | 0.008   |
| MV predilat           | 232 | 1.59 | 0.81, 3.10 | 0.175   |
| MV postdilat          | 232 | 1.75 | 0.95, 3.20 | 0.071   |
| SYNTAX                | 212 |      |            |         |
| < 23                  |     | —    | —          |         |
| 23-33                 |     | 1.80 | 0.74, 4.37 | 0.195   |
| >= 33                 |     | 1.11 | 0.15, 8.17 | 0.920   |
| SYNTAX II PCI         | 210 |      |            |         |
| <= 21.5               |     | —    | —          |         |
| 21.5-30.6             |     | 0.88 | 0.30, 2.63 | 0.821   |
| >= 30.6               |     | 0.98 | 0.37, 2.64 | 0.976   |
| SYNTAX II CABG        | 174 |      |            |         |
| <= 21.5               |     | —    | —          |         |
| 21.5-30.6             |     | 0.68 | 0.26, 1.78 | 0.436   |
| >= 30.6               |     | 1.03 | 0.45, 2.36 | 0.942   |
| Euroscore II          | 232 |      |            |         |
| < 3                   |     | —    | —          |         |
| 3-5                   |     | 1.90 | 0.86, 4.22 | 0.114   |
| >= 5                  |     | 2.78 | 1.29, 5.95 | 0.009   |
| cardiogenic shock     | 232 | 2.25 | 0.54, 9.29 | 0.264   |
| HT                    | 232 | 1.92 | 0.46, 7.95 | 0.368   |
| DM                    | 232 | 1.85 | 1.01, 3.41 | 0.046   |
| dyslipidemia          | 232 | 2.47 | 0.97, 6.28 | 0.058   |
| MI                    | 232 | 2.11 | 1.12, 3.96 | 0.021   |
| PCI                   | 232 | 2.13 | 1.09, 4.16 | 0.027   |
| CABG                  | 232 | 3.31 | 1.58, 6.93 | 0.001   |
| AO                    | 232 | 0.91 | 0.33, 2.55 | 0.859   |
| Stroke                | 232 | 1.53 | 0.55, 4.29 | 0.419   |
| Smoking               | 232 | 1.0  | 0.54, 1.82 | 0.986   |
| CKD                   | 232 | 1.72 | 0.86, 3.42 | 0.123   |
| COPD                  | 232 | 2.42 | 0.95, 6.16 | 0.064   |
| medicine: clopidogrel | 232 | 0.57 | 0.23, 1.46 | 0.245   |

| <b>Characteristic</b>                        | <b>N</b> | <b>HR1</b> | <b>95% CI1</b> | <b>p-value</b> |
|----------------------------------------------|----------|------------|----------------|----------------|
| medicine: ticagrelor                         | 232      | 1.38       | 0.49, 3.85     | 0.544          |
| medicine: ACEI                               | 232      | 1.66       | 0.65, 4.23     | 0.285          |
| medicine: ARB                                | 232      | 0.57       | 0.20, 1.60     | 0.284          |
| medicine: betablocker                        | 232      | 0.78       | 0.19, 3.25     | 0.738          |
| medicine: digoxin                            | 232      | 2.74       | 0.37, 20.0     | 0.321          |
| medicine: Ca-bloker                          | 232      | 1.05       | 0.52, 2.14     | 0.887          |
| medicine: diuretic                           | 232      | 1.87       | 0.98, 3.55     | 0.056          |
| medicine: MRA                                | 232      | 1.40       | 0.70, 2.78     | 0.339          |
| medicine: NTG                                | 232      | 0.83       | 0.20, 3.44     | 0.797          |
| medicine: alfa-adrenolitic                   | 232      | 1.32       | 0.52, 3.37     | 0.558          |
| medicine: ivabradine                         | 232      | 6.57       | 0.90, 48.1     | 0.064          |
| medicine: acenocumarol/warafarin             | 232      | 1.77       | 0.70, 4.51     | 0.230          |
| medicine: rivaroxaban                        | 232      | 2.28       | 0.70, 7.38     | 0.169          |
| medicine: UFH                                | 232      | 2.33       | 0.56, 9.66     | 0.243          |
| medicine: IPP                                | 232      | 1.55       | 0.69, 3.49     | 0.289          |
| medicine: hypoglycaemic                      | 232      | 1.79       | 0.96, 3.34     | 0.066          |
| medicine: insulin                            | 232      | 1.12       | 0.47, 2.65     | 0.801          |
| echo: EF                                     | 195      | 0.98       | 0.96, 1.01     | 0.287          |
| 1HR = Hazard Ratio, CI = Confidence Interval |          |            |                |                |

**Supplementary Table S10.** Univariable Cox regression for TLR: the whole population.

| Characteristic    | N   | HR1  | 95% CI1    | p-value |
|-------------------|-----|------|------------|---------|
| sex               | 232 |      |            |         |
| Female            |     | —    | —          |         |
| Male              |     | 0.73 | 0.32, 1.63 | 0.437   |
| age               | 232 | 0.99 | 0.95, 1.02 | 0.422   |
| CHIP              | 232 | 1.76 | 0.82, 3.81 | 0.150   |
| HBR               | 232 | 1.00 | 0.43, 2.29 | 0.991   |
| ACS               | 232 | 1.68 | 0.71, 4.01 | 0.239   |
| LM                | 232 | 5.13 | 1.54, 17.1 | 0.008   |
| stent length      | 232 | 1.04 | 1.01, 1.07 | 0.005   |
| stent diameter    | 232 | 1.58 | 0.73, 3.40 | 0.241   |
| Lesion type       | 232 |      |            |         |
| A/B1              |     | —    | —          |         |
| B2/C              |     | 2.75 | 1.11, 6.86 | 0.030   |
| calcification     | 232 | 3.29 | 1.24, 8.75 | 0.017   |
| second stent      | 231 | 3.87 | 1.68, 8.90 | 0.001   |
| MV predilat       | 232 | 2.72 | 1.03, 7.22 | 0.044   |
| MV postdilat      | 232 | 2.00 | 0.93, 4.33 | 0.078   |
| SYNTAX            | 212 |      |            |         |
| < 23              |     | —    | —          |         |
| 23-33             |     | 1.39 | 0.41, 4.76 | 0.596   |
| >= 33             |     | 1.73 | 0.23, 13.0 | 0.595   |
| SYNTAX II PCI     | 210 |      |            |         |
| <= 21.5           |     | —    | —          |         |
| 21.5-30.6         |     | 0.70 | 0.20, 2.50 | 0.587   |
| >= 30.6           |     | 0.69 | 0.22, 2.18 | 0.530   |
| SYNTAX II CABG    | 174 |      |            |         |
| <= 21.5           |     | —    | —          |         |
| 21.5-30.6         |     | 0.45 | 0.11, 1.90 | 0.280   |
| >= 30.6           |     | 1.34 | 0.46, 3.85 | 0.590   |
| Euroscore II      | 232 |      |            |         |
| < 3               |     | —    | —          |         |
| 3-5               |     | 1.33 | 0.45, 3.93 | 0.606   |
| >= 5              |     | 1.81 | 0.61, 5.34 | 0.285   |
| cardiogenic shock | 232 | 1.83 | 0.25, 13.5 | 0.555   |
| HTN               | 232 | 2.40 | 0.33, 17.7 | 0.391   |
| DM                | 232 | 1.14 | 0.52, 2.47 | 0.750   |
| dyslipidemia      | 232 | 2.55 | 0.77, 8.49 | 0.127   |
| MI                | 232 | 2.19 | 0.98, 4.92 | 0.057   |
| PCI               | 232 | 1.90 | 0.83, 4.38 | 0.129   |
| CABG              | 232 | 3.08 | 1.16, 8.17 | 0.024   |
| AO                | 232 | 0.72 | 0.17, 3.03 | 0.649   |
| Stroke            | 232 | 2.03 | 0.61, 6.76 | 0.249   |
| Smoking           | 232 | 0.90 | 0.42, 1.95 | 0.797   |
| CKD               | 232 | 1.19 | 0.45, 3.16 | 0.727   |
| COPD              | 232 | 1.40 | 0.33, 5.93 | 0.646   |

| Characteristic                               | N   | HR1  | 95% CI1    | p-value |
|----------------------------------------------|-----|------|------------|---------|
| medicine: clopidogrel                        | 232 | 0.64 | 0.19, 2.13 | 0.466   |
| medicine: ticagrelor                         | 232 | 1.01 | 0.24, 4.28 | 0.989   |
| medicine: ACEI                               | 232 | 5.44 | 0.74, 40.1 | 0.097   |
| medicine: ARB                                | 232 | 0.22 | 0.03, 1.61 | 0.136   |
| medicine: betablocker                        | 232 | 0.47 | 0.11, 2.00 | 0.308   |
| medicine: Ca-blocker                         | 232 | 1.48 | 0.64, 3.41 | 0.353   |
| medicine: diuretic                           | 232 | 1.30 | 0.60, 2.83 | 0.510   |
| medicine: MRA                                | 232 | 0.92 | 0.35, 2.45 | 0.873   |
| medicine: NTG                                | 232 | 0.66 | 0.09, 4.87 | 0.683   |
| medicine: alfa-adrenolitic                   | 232 | 1.77 | 0.61, 5.14 | 0.293   |
| medicine: acenocumarol/warafarin             | 232 | 1.03 | 0.24, 4.36 | 0.967   |
| medicine: rivaroxaban                        | 232 | 1.18 | 0.16, 8.71 | 0.871   |
| medicine: IPP                                | 232 | 1.32 | 0.50, 3.50 | 0.577   |
| medicine: hypoglycaemic                      | 232 | 1.05 | 0.44, 2.50 | 0.907   |
| medicine: insulin                            | 232 | 0.57 | 0.13, 2.40 | 0.441   |
| echo: EF                                     | 195 | 1.03 | 0.98, 1.08 | 0.244   |
| 1HR = Hazard Ratio, CI = Confidence Interval |     |      |            |         |

**Supplementary Table S11.** Univariable Cox regression for MACE: CHIP population.

| Characteristic | N  | HR1  | 95% CI1    | p-value |
|----------------|----|------|------------|---------|
| Sex            | 81 |      |            |         |
| Female         |    | —    | —          |         |
| Male           |    | 0.77 | 0.29, 2.02 | 0.590   |
| Age            | 81 | 1.01 | 0.97, 1.05 | 0.648   |
| HBR            | 81 | 1.97 | 0.79, 4.91 | 0.143   |
| ACS            | 81 | 1.17 | 0.48, 2.89 | 0.730   |
| LM             | 81 | 3.33 | 1.10, 10.1 | 0.033   |
| stent_length   | 81 | 1.01 | 0.98, 1.04 | 0.579   |
| stent_diameter | 81 | 1.25 | 0.51, 3.04 | 0.624   |
| Lesion type    | 81 |      |            |         |
| A/B1           |    | —    | —          |         |
| B2/C           |    | 1.50 | 0.54, 4.16 | 0.438   |
| calcification  | 81 | 2.27 | 0.75, 6.86 | 0.146   |
| second_stent   | 81 | 0.74 | 0.22, 2.55 | 0.638   |
| MV_predilat    | 81 | 1.55 | 0.59, 4.08 | 0.374   |
| MV_postdilat   | 81 | 1.60 | 0.65, 3.93 | 0.308   |
| SYNTAX         | 70 |      |            |         |
| < 23           |    | —    | —          |         |
| 23-33          |    | 2.26 | 0.71, 7.21 | 0.169   |
| >= 33          |    | 0.00 | 0.00, Inf  | 0.998   |
| SYNTAX_II_PCI  | 69 |      |            |         |
| <= 21.5        |    | —    | —          |         |
| 21.5-30.6      |    | 0.41 | 0.04, 3.95 | 0.441   |
| >= 30.6        |    | 0.54 | 0.07, 4.22 | 0.557   |
| SYNTAX_II_CABG | 61 |      |            |         |
| <= 21.5        |    | —    | —          |         |
| 21.5-30.6      |    | 3.54 | 0.43, 29.4 | 0.242   |
| >= 30.6        |    | 3.79 | 0.47, 30.3 | 0.209   |
| Euroscore_II   | 81 |      |            |         |
| < 3            |    | —    | —          |         |

| Characteristic                               | N  | HR1  | 95% CI1    | p-value |
|----------------------------------------------|----|------|------------|---------|
| 3-5                                          |    | 2.32 | 0.80, 6.70 | 0.119   |
| >= 5                                         |    | 2.55 | 0.83, 7.80 | 0.101   |
| cardiogenic_shock                            | 81 | 1.78 | 0.24, 13.3 | 0.575   |
| HT                                           | 81 | 1.33 | 0.18, 9.99 | 0.779   |
| DM                                           | 81 | 2.51 | 0.90, 6.96 | 0.078   |
| dyslipidemia                                 | 81 | 3.08 | 0.41, 23.1 | 0.273   |
| MI                                           | 81 | 3.06 | 1.10, 8.51 | 0.032   |
| PCI                                          | 81 | 2.86 | 0.95, 8.63 | 0.062   |
| CABG                                         | 81 | 2.48 | 0.89, 6.90 | 0.081   |
| AO                                           | 81 | 1.15 | 0.34, 3.96 | 0.821   |
| Stroke                                       | 81 | 2.02 | 0.47, 8.76 | 0.348   |
| Smoking                                      | 81 | 0.45 | 0.18, 1.12 | 0.084   |
| Chronic kidney disease                       | 81 | 2.79 | 1.10, 7.09 | 0.031   |
| COPD                                         | 81 | 1.28 | 0.30, 5.54 | 0.743   |
| medicine_clopidogrel                         | 81 | 0.43 | 0.13, 1.48 | 0.182   |
| medicine_ticagrelor                          | 81 | 1.53 | 0.35, 6.65 | 0.568   |
| medicine_ACEI                                | 81 | 1.16 | 0.34, 3.97 | 0.818   |
| medicine_ARB                                 | 81 | 0.96 | 0.28, 3.29 | 0.947   |
| medicine_betablocker                         | 81 | 0.01 | 0.00, 0.20 | 0.002   |
| medicine_Ca_blocker                          | 81 | 0.78 | 0.26, 2.34 | 0.655   |
| medicine_diuretic                            | 81 | 3.64 | 1.06, 12.5 | 0.040   |
| medicine_MRA                                 | 81 | 1.94 | 0.74, 5.10 | 0.180   |
| medicine_alfa_adrenolitic                    | 81 | 2.22 | 0.51, 9.63 | 0.287   |
| medicine_ivabradine                          | 81 | 4.66 | 0.61, 35.3 | 0.136   |
| medicine_acenocumarol_warafarin              | 81 | 2.33 | 0.54, 10.1 | 0.258   |
| medicine_rivaroxaban                         | 81 | 4.24 | 1.23, 14.6 | 0.022   |
| medicine_IPP                                 | 81 | 1.76 | 0.41, 7.63 | 0.449   |
| medicine_hypoglycaemic                       | 81 | 2.00 | 0.81, 4.91 | 0.133   |
| medicine_insulin                             | 81 | 0.86 | 0.29, 2.59 | 0.787   |
| echo_EF                                      | 74 | 0.97 | 0.94, 1.01 | 0.168   |
| 1HR = Hazard Ratio, CI = Confidence Interval |    |      |            |         |

**Supplementary Table S12.** Univariable Cox regression for TLR: CHIP population.

| Characteristic | N  | HR1  | 95% CI1    | p-value |
|----------------|----|------|------------|---------|
| Sex            | 81 |      |            |         |
| Female         |    | —    | —          |         |
| Male           |    | 0.50 | 0.16, 1.58 | 0.239   |
| Age            | 81 | 0.99 | 0.95, 1.04 | 0.763   |
| HBR            | 81 | 0.72 | 0.22, 2.38 | 0.587   |
| ACS            | 81 | 1.04 | 0.34, 3.24 | 0.939   |
| LM             | 81 | 2.46 | 0.54, 11.2 | 0.246   |
| stent_length   | 81 | 1.03 | 0.99, 1.07 | 0.101   |
| stent_diameter | 81 | 1.87 | 0.63, 5.62 | 0.262   |
| Lesion type    | 81 |      |            |         |
| A/B1           |    | —    | —          |         |
| B2/C           |    | 5.82 | 0.75, 45.1 | 0.092   |
| calcification  | 81 | 2.71 | 0.73, 10.1 | 0.135   |
| second_stent   | 81 | 0.70 | 0.15, 3.18 | 0.641   |
| MV_predilat    | 81 | 3.53 | 0.77, 16.1 | 0.103   |
| MV_postdilat   | 81 | 2.83 | 0.85, 9.40 | 0.090   |
| SYNTAX         | 70 |      |            |         |
| < 23           |    | —    | —          |         |
| 23-33          |    | 1.83 | 0.37, 9.09 | 0.459   |
| >= 33          |    | 0.00 | 0.00, Inf  | 0.999   |
| SYNTAX_II_PCI  | 69 |      |            |         |
| <= 21.5        |    | —    | —          |         |
| 21.5-30.6      |    | 0.28 | 0.03, 3.10 | 0.300   |
| >= 30.6        |    | 0.28 | 0.03, 2.37 | 0.240   |
| SYNTAX_II_CABG | 61 |      |            |         |
| <= 21.5        |    | —    | —          |         |
| 21.5-30.6      |    | 1.73 | 0.18, 16.7 | 0.633   |
| >= 30.6        |    | 2.78 | 0.34, 23.1 | 0.343   |
| Euroscore_II   | 81 |      |            |         |
| < 3            |    | —    | —          |         |

| Characteristic                               | N  | HR1  | 95% CI1    | p-value |
|----------------------------------------------|----|------|------------|---------|
| 3-5                                          |    | 1.54 | 0.38, 6.16 | 0.543   |
| >= 5                                         |    | 2.03 | 0.51, 8.12 | 0.317   |
| cardiogenic_shock                            | 81 | 3.00 | 0.39, 23.2 | 0.293   |
| HT                                           | 81 | 0.82 | 0.11, 6.38 | 0.853   |
| DM                                           | 81 | 1.77 | 0.53, 5.89 | 0.350   |
| dyslipidemia                                 | 81 | 1.88 | 0.24, 14.6 | 0.545   |
| MI                                           | 81 | 2.17 | 0.65, 7.21 | 0.207   |
| PCI                                          | 81 | 1.51 | 0.45, 5.02 | 0.501   |
| CABG                                         | 81 | 3.43 | 1.03, 11.4 | 0.044   |
| AO                                           | 81 | 0.56 | 0.07, 4.31 | 0.575   |
| stroke                                       | 81 | 3.36 | 0.73, 15.4 | 0.119   |
| Smoking                                      | 81 | 0.45 | 0.14, 1.42 | 0.175   |
| CKD                                          | 81 | 1.56 | 0.42, 5.79 | 0.503   |
| medicine_clopidogrel                         | 81 | 0.25 | 0.07, 0.94 | 0.039   |
| medicine_ticagrelor                          | 81 | 2.52 | 0.55, 11.5 | 0.233   |
| medicine_ACEI                                | 81 | 2.40 | 0.31, 18.6 | 0.402   |
| medicine_ARB                                 | 81 | 0.46 | 0.06, 3.57 | 0.458   |
| medicine_Ca_blocker                          | 81 | 0.96 | 0.26, 3.54 | 0.948   |
| medicine_diuretic                            | 81 | 2.01 | 0.54, 7.42 | 0.296   |
| medicine_MRA                                 | 81 | 0.83 | 0.18, 3.80 | 0.814   |
| medicine_alfa_adrenolitic                    | 81 | 1.69 | 0.22, 13.1 | 0.617   |
| medicine_acenocumarol_warafarin              | 81 | 1.76 | 0.23, 13.6 | 0.590   |
| medicine_rivaroxaban                         | 81 | 1.94 | 0.25, 15.1 | 0.526   |
| medicine_IPP                                 | 81 | 1.03 | 0.22, 4.68 | 0.974   |
| medicine_hypoglycaemic                       | 81 | 1.25 | 0.40, 3.95 | 0.700   |
| medicine_insulin                             | 81 | 0.30 | 0.04, 2.31 | 0.248   |
| echo_EF                                      | 74 | 1.05 | 0.97, 1.13 | 0.249   |
| 1HR = Hazard Ratio, CI = Confidence Interval |    |      |            |         |



**Supplementary Table S13.** Univariable Cox regression for MACE: HBR population.

| Characteristic       | N  | HR <sup>1</sup> | 95% CI <sup>1</sup> | p-value |
|----------------------|----|-----------------|---------------------|---------|
| Sex                  | 76 |                 |                     |         |
| Female               |    | —               | —                   |         |
| Male                 |    | 0.79            | 0.31, 2.00          | 0.612   |
| Age                  | 76 | 0.97            | 0.92, 1.02          | 0.187   |
| CHIP                 | 76 | 1.78            | 0.72, 4.44          | 0.213   |
| ACS                  | 76 | 0.72            | 0.29, 1.77          | 0.476   |
| LM                   | 76 | 3.71            | 1.08, 12.7          | 0.038   |
| stent_length         | 76 | 0.99            | 0.94, 1.04          | 0.662   |
| stent_diameter       | 76 | 0.63            | 0.23, 1.68          | 0.354   |
| Lesion type          | 76 |                 |                     |         |
| A/B1                 |    | —               | —                   |         |
| B2/C                 |    | 0.87            | 0.35, 2.15          | 0.765   |
| calcification        | 76 | 2.71            | 0.79, 9.32          | 0.115   |
| second_stent         | 76 | 1.92            | 0.77, 4.78          | 0.159   |
| MV_predilat          | 76 | 1.70            | 0.61, 4.72          | 0.308   |
| MV_postdilat         | 76 | 1.76            | 0.72, 4.34          | 0.217   |
| SYNTAX               | 66 |                 |                     |         |
| < 23                 |    | —               | —                   |         |
| 23-33                |    | 3.27            | 0.91, 11.8          | 0.070   |
| >= 33                |    | 0.00            | 0.00, Inf           | 0.998   |
| SYNTAX_II_CABG       | 63 |                 |                     |         |
| <= 21.5              |    | —               | —                   |         |
| 21.5-30.6            |    | 0.61            | 0.16, 2.28          | 0.466   |
| >= 30.6              |    | 1.01            | 0.32, 3.18          | 0.986   |
| Euroscore_II         | 76 |                 |                     |         |
| < 3                  |    | —               | —                   |         |
| 3-5                  |    | 3.20            | 0.92, 11.1          | 0.067   |
| >= 5                 |    | 3.43            | 1.15, 10.2          | 0.027   |
| cardiogenic_shock    | 76 | 4.75            | 1.09, 20.7          | 0.038   |
| HT                   | 76 | 1.34            | 0.18, 10.1          | 0.775   |
| DM                   | 76 | 3.36            | 1.11, 10.1          | 0.032   |
| dyslipidemia         | 76 | 5.20            | 0.69, 39.0          | 0.108   |
| MI                   | 76 | 2.35            | 0.85, 6.52          | 0.102   |
| PCI                  | 76 | 2.13            | 0.71, 6.43          | 0.178   |
| CABG                 | 76 | 2.45            | 0.88, 6.80          | 0.086   |
| AO                   | 76 | 2.29            | 0.76, 6.91          | 0.142   |
| stroke               | 76 | 0.90            | 0.21, 3.92          | 0.892   |
| smoking              | 76 | 2.47            | 0.99, 6.14          | 0.052   |
| CKD                  | 76 | 2.90            | 1.17, 7.23          | 0.022   |
| COPD                 | 76 | 3.55            | 1.17, 10.7          | 0.025   |
| medicine_clopidogrel | 76 | 0.99            | 0.13, 7.44          | 0.995   |
| medicine_ticagrelor  | 76 | 1.01            | 0.13, 7.54          | 0.995   |
| medicine_ACEI        | 76 | 1.47            | 0.43, 5.04          | 0.542   |
| medicine_ARB         | 76 | 0.56            | 0.13, 2.41          | 0.435   |
| medicine_betablocker | 76 | 0.60            | 0.08, 4.51          | 0.620   |

| Characteristic                                           | N  | HR <sup>1</sup> | 95% CI <sup>1</sup> | p-value |
|----------------------------------------------------------|----|-----------------|---------------------|---------|
| medicine_digoxin                                         | 76 | 2.37            | 0.31, 17.8          | 0.402   |
| medicine_Ca_blocker                                      | 76 | 1.50            | 0.50, 4.54          | 0.469   |
| medicine_diuretic                                        | 76 | 2.40            | 0.55, 10.4          | 0.242   |
| medicine_MRA                                             | 76 | 2.22            | 0.89, 5.53          | 0.086   |
| medicine_NTG                                             | 76 | 0.56            | 0.08, 4.23          | 0.578   |
| medicine_alfa_adrenolitic                                | 76 | 1.82            | 0.60, 5.50          | 0.287   |
| medicine_ivabradine                                      | 76 | 4.37            | 0.58, 33.1          | 0.153   |
| medicine_acenocumarol_warafarin                          | 76 | 1.31            | 0.47, 3.65          | 0.600   |
| medicine_rivaroxaban                                     | 76 | 1.10            | 0.25, 4.78          | 0.896   |
| medicine_UFH                                             | 76 | 1.62            | 0.37, 7.01          | 0.521   |
| medicine_IPP                                             | 76 | 1.07            | 0.31, 3.67          | 0.914   |
| medicine_hypoglycaemic                                   | 76 | 4.03            | 1.62, 10.1          | 0.003   |
| medicine_insulin                                         | 76 | 1.35            | 0.49, 3.75          | 0.565   |
| echo_EF                                                  | 67 | 0.97            | 0.94, 1.01          | 0.113   |
| <sup>1</sup> HR = Hazard Ratio, CI = Confidence Interval |    |                 |                     |         |

**Supplementary Table S14.** Univariable Cox regression for TLR: HBR population.

| Characteristic            | N  | HR <sup>1</sup> | 95% CI <sup>1</sup> | p-value |
|---------------------------|----|-----------------|---------------------|---------|
| Sex                       | 76 |                 |                     |         |
| Female                    |    | —               | —                   |         |
| Male                      |    | 0.29            | 0.07, 1.22          | 0.092   |
| Age                       | 76 | 0.96            | 0.89, 1.03          | 0.267   |
| CHIP                      | 76 | 1.28            | 0.32, 5.13          | 0.726   |
| ACS                       | 76 | 1.06            | 0.25, 4.43          | 0.937   |
| LM                        | 76 | 2.79            | 0.34, 22.7          | 0.337   |
| stent_length              | 76 | 1.02            | 0.95, 1.10          | 0.503   |
| stent_diameter            | 76 | 0.32            | 0.05, 1.99          | 0.222   |
| Lesion type               | 76 |                 |                     |         |
| A/B1                      |    | —               | —                   |         |
| B2/C                      |    | 1.60            | 0.38, 6.69          | 0.520   |
| calcification             | 76 | 1.95            | 0.24, 16.0          | 0.532   |
| second_stent              | 76 | 2.27            | 0.54, 9.51          | 0.261   |
| MV_postdilat              | 76 | 5.73            | 1.16, 28.4          | 0.033   |
| SYNTAX                    | 66 |                 |                     |         |
| < 23                      |    | —               | —                   |         |
| 23-33                     |    | 2.32            | 0.27, 20.0          | 0.445   |
| >= 33                     |    | 0.00            | 0.00, Inf           | 0.999   |
| SYNTAX_II_CABG            | 63 |                 |                     |         |
| <= 21.5                   |    | —               | —                   |         |
| 21.5-30.6                 |    | 0.00            | 0.00, Inf           | 0.998   |
| >= 30.6                   |    | 1.19            | 0.28, 4.97          | 0.815   |
| Euroscore_II              | 76 |                 |                     |         |
| < 3                       |    | —               | —                   |         |
| 3-5                       |    | 3.09            | 0.43, 22.0          | 0.260   |
| >= 5                      |    | 3.92            | 0.72, 21.5          | 0.115   |
| cardiogenic_shock         | 76 | 5.47            | 0.66, 45.0          | 0.114   |
| DM                        | 76 | 1.48            | 0.35, 6.22          | 0.589   |
| MI                        | 76 | 2.37            | 0.48, 11.7          | 0.291   |
| PCI                       | 76 | 1.62            | 0.33, 8.05          | 0.552   |
| CABG                      | 76 | 2.50            | 0.50, 12.4          | 0.262   |
| AO                        | 76 | 2.63            | 0.53, 13.0          | 0.236   |
| udar                      | 76 | 1.20            | 0.15, 9.76          | 0.865   |
| Smoking                   | 76 | 5.39            | 1.09, 26.7          | 0.039   |
| Chronic kidney disease    | 76 | 3.58            | 0.85, 15.0          | 0.082   |
| COPD                      | 76 | 1.63            | 0.20, 13.2          | 0.648   |
| medicine_clopidogrel      | 76 | 0.40            | 0.05, 3.26          | 0.393   |
| medicine_ticagrelor       | 76 | 2.49            | 0.31, 20.3          | 0.393   |
| medicine_betablocker      | 76 | 0.23            | 0.03, 1.87          | 0.170   |
| medicine_Ca_blocker       | 76 | 3.17            | 0.76, 13.3          | 0.114   |
| medicine_diuretic         | 76 | 0.86            | 0.17, 4.25          | 0.851   |
| medicine_MRA              | 76 | 0.94            | 0.19, 4.66          | 0.939   |
| medicine_NTG              | 76 | 1.44            | 0.18, 11.7          | 0.732   |
| medicine_alfa_adrenolitic | 76 | 3.82            | 0.91, 16.0          | 0.067   |

| Characteristic                  | N  | HR <sup>1</sup> | 95% CI <sup>1</sup> | p-value |
|---------------------------------|----|-----------------|---------------------|---------|
| medicine_acenocumarol_warafarin | 76 | 1.13            | 0.23, 5.62          | 0.878   |
| medicine_IPP                    | 76 | 1.46            | 0.18, 11.9          | 0.722   |
| medicine_hypoglycaemic          | 76 | 2.65            | 0.66, 10.6          | 0.170   |
| medicine_insulin                | 76 | 1.27            | 0.26, 6.31          | 0.768   |
| echo_EF                         | 67 | 1.04            | 0.96, 1.14          | 0.312   |

<sup>1</sup>HR = Hazard Ratio, CI = Confidence Interval
